# Supplementary material
Source: PubMed Central journal article supplement (PMC4172918)
Supplement: NIHMS618329-supplement-01.pdf [file NIHMS618329-supplement-01.pdf]

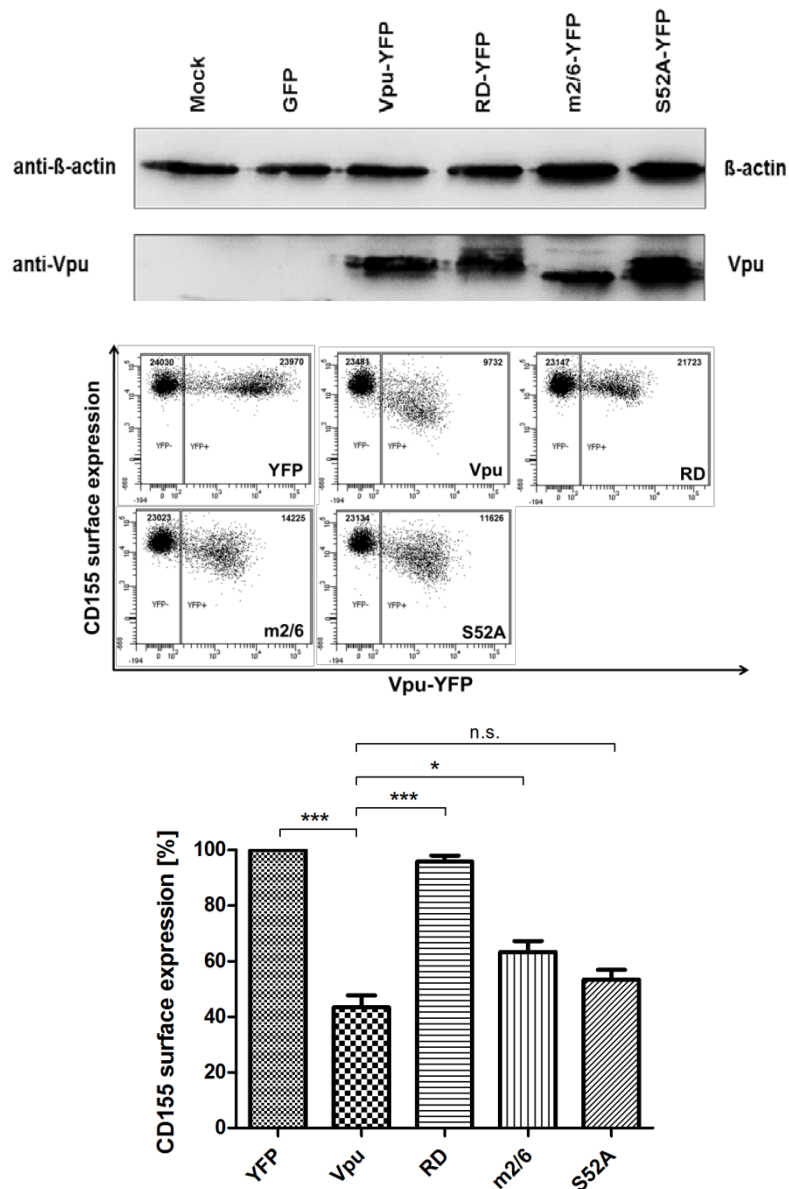

Figure S1: Effect of CK-2 phosphorylation sites on the surface expression of CD155. HeLa cells were transfected with either YFP, *wt* Vpu, Vpu RD, Vpu m2/6 or Vpu S52A-YFP fusion proteins. 24 h post transfection, cells were harvested and stained for surface CD155 using a CD155 specific antibody and analyzed by flow cytometry. Summary of relative CD155 surface expression in presence of *wt* Vpu or mutants is given below. Values from three independent experiments were plotted and assessed for statistical significance by using the GrapPad Prism V5.0 software package (\*\*\*;  $p \leq 0.0005$ , 1 way- ANOVA with Dunnett's test). In addition, cells were lysed and analyzed by Western blot using anti- $\beta$ -actin and anti-Vpu antibodies.
